# Supplementary material
Source: PubMed Central journal article supplement (PMC3660232)
Supplement: NIHMS458377-supplement-tables_1-6.pdf [file NIHMS458377-supplement-tables_1-6.pdf]

**Supplementary Table 1:** Summary of tumor-bearing NIC/ShcA<sup>fl/fl</sup> transgenic females.

| Mouse Number | Parity                   | Number of Litters | Number of Tumors |
|--------------|--------------------------|-------------------|------------------|
| 2749         | Multiparous              | 10                | 2 (BT1, BT2)     |
| 6262         | Multiparous              | 8                 | 1                |
| 8033         | Multiparous              | 6                 | 1                |
| 8296         | Multiparous              | 5                 | 2 (BT1, BT2)     |
| 9094         | Multiparous              | 9                 | 1                |
| 1474         | Multiparous <sup>1</sup> | 0                 | 2 (BT1, BT2)     |
| 5479         | Virgin <sup>2</sup>      | 0                 | 2 (BT1, BT2)     |
| 5863         | Virgin <sup>2</sup>      | 0                 | 2 (BT1, BT2)     |

1. This female was mated with a male from 8 weeks of age but never had a visible pregnancy. She was nonetheless placed into the multiparous cohort to account for the possibility of a failed pregnancy.
2. These females were never mated with a male and thus are part of the virgin cohort.

**Supplementary Table 2: Differentially-expressed chemokines and their receptors in NIC/ShcA-null mammary tumors.**

| <b>Gene<sup>c</sup></b> | <b>Chemotactic Gene Function</b>                                 | <b>Avg FC<sup>b</sup></b> | <b>2749BT1<sup>a</sup></b> | <b>2749BT2<sup>a</sup></b> | <b>6262<sup>a</sup></b> | <b>1474BT1<sup>aa</sup></b> | <b>1474BT2<sup>a</sup></b> | <b>8296BT1<sup>a</sup></b> | <b>8296BT2<sup>a</sup></b> | <b>9094<sup>a</sup></b> |
|-------------------------|------------------------------------------------------------------|---------------------------|----------------------------|----------------------------|-------------------------|-----------------------------|----------------------------|----------------------------|----------------------------|-------------------------|
| Ccl2                    | monocytes, basophils, memory T cells, dendritic cells            | 1.7 ± 0.7                 | 1.3                        | 1.5                        | <b>3.1</b>              | 1.3                         | 1.4                        | 2.1                        | <b>2.1</b>                 | 1.0                     |
| Ccl3                    | polymorphonuclear leukocytes                                     | 1.8 ± 1                   | 1.8                        | 1.4                        | <b>2.6</b>              | 1.1                         | 0.7                        | <b>3.8</b>                 | 1.5                        | 1.7                     |
| Ccl5                    | monocytes, eosinophils, memory T cells, dendritic cells          | 2.7 ± 2.6                 | 1.3                        | 1.7                        | 1.4                     | 1.4                         | 1.3                        | 1.8                        | <b>8.9</b>                 | <b>3.4</b>              |
| Ccl7                    | monocytes                                                        | 1.8 ± 1.3                 | 1.2                        | 1.3                        | <b>4.9</b>              | 1.1                         | 1.0                        | <b>2.1</b>                 | 1.7                        | 0.9                     |
| Ccl8                    | monocytes, T cells, NK cells, mast cells, eosinophils, basophils | 2 ± 1.5                   | 0.9                        | 1.7                        | <b>5.4</b>              | <b>2.4</b>                  | 1.5                        | 1.8                        | 1.7                        | 0.5                     |
| Ccl12                   | monocytes, eosinophils                                           | 1.5 ± .7                  | 1.2                        | 1.0                        | <b>3.1</b>              | 1.0                         | 0.8                        | 1.7                        | 1.7                        | 1.1                     |
| Ccl17                   | T cells                                                          | 2 ± 1.4                   | 1.0                        | 1.4                        | <b>2.3</b>              | 1.2                         | 1.7                        | <b>5.0</b>                 | <b>2.9</b>                 | 0.9                     |
| <b>Ccl19</b>            | B cells and T cells                                              | 3.9 ± 4.1                 | 1.3                        | 1.8                        | <b>3.2</b>              | 2.5                         | <b>2.4</b>                 | <b>4.9</b>                 | <b>13.7</b>                | 1.6                     |
| Ccl22                   | monocytes, dendritic cells, NK cells, activated T cells          | 4.8 ± 0.8                 | <b>3.1</b>                 | 1.2                        | <b>3.5</b>              | 3.2                         | 1.4                        | 0.9                        | <b>24.3</b>                | <b>0.4</b>              |
| Ccl24                   | resting T cells, eosinophils                                     | 1.4 ± 0.9                 | 0.6                        | 0.9                        | <b>3.0</b>              | 1.6                         | 0.8                        | <b>2.4</b>                 | 1.5                        | <b>0.5</b>              |
| Ccl25                   | activated macrophages, dendritic cells                           | 0.9 ± 0.7                 | <b>0.5</b>                 | <b>0.4</b>                 | <b>0.4</b>              | 0.8                         | 0.8                        | <b>2.6</b>                 | 1.4                        | 0.6                     |
| Ccl27                   | memory T cells                                                   | 0.8 ± 0.2                 | 0.9                        | 0.8                        | 0.8                     | 0.6                         | 0.6                        | 1.2                        | 1.0                        | 0.6                     |
| Cxcl1                   | neutrophils                                                      | 0.9 ± 0.6                 | <b>0.4</b>                 | 1.1                        | <b>2.1</b>              | <b>0.5</b>                  | <b>0.4</b>                 | 0.9                        | 0.7                        | 1.0                     |
| Cxcl5                   | neutrophils                                                      | 0.9 ± 0.9                 | <b>0.2</b>                 | 0.8                        | <b>2.8</b>              | 0.7                         | <b>0.2</b>                 | 1.2                        | 1.0                        | <b>0.5</b>              |
| <b>Cxcl9</b>            | NK cells, T cells; IFN $\gamma$ -inducible                       | 5.1 ± 2.8                 | <b>3.9</b>                 | <b>5.3</b>                 | <b>2.3</b>              | <b>7.7</b>                  | <b>6.9</b>                 | <b>2.6</b>                 | <b>9.8</b>                 | <b>2.2</b>              |
| <b>Cxcl10</b>           | NK cells, T cells; IFN $\gamma$ -inducible                       | 4.3 ± 1.6                 | <b>4.4</b>                 | <b>6.9</b>                 | <b>2.4</b>              | <b>3.5</b>                  | <b>2.2</b>                 | <b>5.0</b>                 | <b>5.2</b>                 | <b>4.6</b>              |
| <b>Cxcl11</b>           | activated T cells; IFN $\gamma$ -inducible                       | 3.7 ± 2.7                 | <b>2.5</b>                 | <b>9.7</b>                 | 1.9                     | <b>3.6</b>                  | 1.9                        | 1.3                        | <b>5.2</b>                 | <b>3.6</b>              |
| Cxcl12                  | endothelial progenitor cells                                     | 1.5 ± 0.7                 | 1.5                        | <b>2.6</b>                 | <b>2.1</b>              | 0.7                         | <b>0.4</b>                 | 1.2                        | 1.8                        | 1.7                     |
| <b>Cxcl13</b>           | B cells                                                          | 7.1 ± 5.9                 | 1.2                        | <b>3.0</b>                 | <b>2.2</b>              | <b>6.5</b>                  | <b>4.3</b>                 | <b>12.3</b>                | <b>18.5</b>                | <b>8.7</b>              |
| <b>Cxcl14</b>           | monocytes, dendritic cells, NK cells                             | 2.6 ± 1.5                 | 1.6                        | <b>2.3</b>                 | <b>5.7</b>              | 1.9                         | 1.7                        | <b>2.3</b>                 | <b>3.8</b>                 | 1.4                     |
| Cxcl15                  | neutrophils                                                      | 1.8 ± 1.1                 | 0.9                        | 1.4                        | <b>2.3</b>              | 0.8                         | 1.9                        | 1.5                        | <b>4.2</b>                 | 1.0                     |
| Cxcl16                  | T cells, NKT cells; IFN $\gamma$ -inducible                      | 1.4 ± 0.6                 | 0.8                        | 1.6                        | <b>2.7</b>              | 1.0                         | 0.8                        | 1.3                        | 1.3                        | 1.5                     |
| <b>Cx3cl1</b>           | NK and T cells (soluble); endothelial cells (mb bound)           | 0.5 ± 0.2                 | <b>0.4</b>                 | 0.7                        | 0.8                     | <b>0.4</b>                  | <b>0.5</b>                 | <b>0.4</b>                 | <b>0.4</b>                 | 0.6                     |
| Xcl1                    | T cells                                                          | 1.0 ± 0.5                 | 1.5                        | 0.6                        | <b>0.4</b>              | 1.3                         | 1.1                        | 0.7                        | 1.6                        | 0.7                     |
| <b>Ccr2</b>             | Ccl2, Ccl7, Ccl8, Ccl11, Ccl13 and Ccl16 receptor                | 3.0 ± 2.3                 | 1.5                        | 1.3                        | <b>4.9</b>              | <b>2.5</b>                  | 1.1                        | <b>7.5</b>                 | <b>4.0</b>                 | 1.1                     |
| Ccr3                    | Ccl11, Ccl13, Ccl24, Ccl26 and Ccl28 receptor                    | 1.2 ± 0.3                 | 1.3                        | 1.2                        | 1.8                     | 1.2                         | 0.7                        | 1.2                        | 1.1                        | 1.1                     |
| Ccr4                    | Ccl17 and Ccl22 receptor                                         | 1.4 ± 0.4                 | 1.6                        | 1.1                        | 1.1                     | 1.4                         | <b>2.2</b>                 | 1.2                        | 1.2                        | 1.2                     |
| Ccr5                    | Ccl4, Ccl5, Ccl8, Ccl11, Ccl13 and Ccl16 receptor                | 1.6 ± 0.6                 | 1.2                        | 1.7                        | <b>2.7</b>              | 1.4                         | 1.1                        | <b>2.1</b>                 | 1.6                        | 1.3                     |
| <b>Ccr7</b>             | Ccl19 receptor                                                   | 4.5 ± 6.5                 | <b>2.2</b>                 | 1.4                        | <b>4.9</b>              | <b>2.0</b>                  | <b>2.6</b>                 | 0.9                        | <b>20.1</b>                | 1.3                     |
| Ccr9                    | Ccl25 receptor                                                   | 2.0 ± 1.4                 | 1.6                        | 1.2                        | 1.5                     | 1.3                         | 1.2                        | <b>4.8</b>                 | <b>3.4</b>                 | 1.0                     |
| <b>Cxcr3</b>            | Cxcl9, Cxcl10 and Cxcl11 receptor                                | 2.7 ± 2.1                 | 1.4                        | 1.5                        | <b>2.2</b>              | <b>2.0</b>                  | 1.8                        | <b>4.1</b>                 | <b>7.2</b>                 | 1.1                     |
| <b>Cxcr4</b>            | Cxcl12 receptor                                                  | 2.0 ± 0.8                 | <b>2.0</b>                 | 0.6                        | 1.4                     | <b>2.4</b>                  | <b>2.6</b>                 | <b>2.9</b>                 | <b>2.4</b>                 | 1.7                     |
| <b>Cxcr6</b>            | Cxcl16 receptor                                                  | 2.8 ± 2.4                 | 1.2                        | 1.2                        | 2.0                     | <b>2.5</b>                  | <b>2.2</b>                 | <b>3.0</b>                 | <b>8.5</b>                 | 1.3                     |
| Xcr1                    | Xcl1 receptor                                                    | 1.5 ± 0.5                 | 1.8                        | 0.9                        | 1.6                     | 1.8                         | 1.2                        | 1.2                        | <b>2.3</b>                 | 0.8                     |
| <b>Cx3cr1</b>           | Cx3cl1 receptor                                                  | 0.6 ± 0.3                 | <b>0.4</b>                 | 1.0                        | 1.1                     | <b>0.5</b>                  | <b>0.4</b>                 | <b>0.4</b>                 | <b>0.4</b>                 | <b>0.4</b>              |

<sup>a</sup>Fold change (log<sub>2</sub>) from the Agilent array for each individual NIC/ShcA<sup>fl/fl</sup> tumor relative to a pool of five NIC/ShcA<sup>+/+</sup> tumors.

<sup>b</sup>Average fold change for each gene over all eight NIC/ShcA<sup>fl/fl</sup> tumors.

<sup>c</sup>Genes that are differentially regulated, at least two fold, in at least 50% of the NIC/ShcA-null tumors are highlighted

**Supplementary Table 3: A 43 gene ShcA-regulated immune signature (SRIS) that is differentially regulated in NIC/ShcA<sup>fl/fl</sup> mammary tumors<sup>a</sup>**

| Mouse Gene | Human Gene | Entrez ID   | Gene Function                                              | # DE tumors <sup>b</sup>      | Avg. FC <sup>c</sup> | Avg FC (DE) <sup>d</sup> | Avg. P Value <sup>e</sup> | Ref  |
|------------|------------|-------------|------------------------------------------------------------|-------------------------------|----------------------|--------------------------|---------------------------|------|
| CD247      | CD247      | NM198053    | Zeta chain of the TCR;                                     | 6/8                           | 3.1 ± 4.2            | 3.7 ± 4.7                | 0.0008                    | (1)  |
| CD3e       | CD3E       | NM000733    | Epsilon subunit of the TCR-CD3 complex                     | Validated by IHC <sup>f</sup> | 2.4 ± 1.6            | N/A                      | N/A                       | (2)  |
| CD4        | CD4        | NM000616    | expressed by Th cells; binds MHC class II                  | 7/8                           | 3 ± 3.8              | 3.2 ± 4                  | 0.0006                    | (3)  |
| CD28       | CD28       | NM006139    | Co-stimulatory molecule in T cells                         | qRT-PCR <sup>f</sup>          | 3.5 ± 4.4            | 6.9 ± 6.1                | 0.001                     | (4)  |
| Ctla4      | CTLA4      | NM005214    | T cell co-inhibitory molecule                              | 6/8                           | 3 ± 2.7              | 3.5 ± 2.8                | <0.0001                   | (4)  |
| Cxcl11     | CXCL11     | NM005409    | Chemotactic for T cells; induced by IFN $\gamma$ signaling | 7/8                           | 3.7 ± 2.8            | 4.1 ± 2.8                | 0.0001                    | (5)  |
| Cxcl13     | CXCL13     | NM006419    | Chemotactic for B cells                                    | 7/8                           | 7.1 ± 6              | 7.9 ± 5.8                | 0.0002                    | (5)  |
| Cxcl9      | CXCL9      | NM002416    | Chemotactic for T cells; induced by IFN $\gamma$ signaling | 8/8                           | 5 ± 2.8              | 5 ± 2.8                  | 0.0005                    | (5)  |
| Cxcr3      | CXCR3      | NM001142797 | Receptor for CXCL9, CXCL10 and CXCL11                      | 7/8                           | 2.7 ± 2.1            | 2.9 ± 2.1                | 0.005                     | (5)  |
| H2-Aa      | HLA-DQA1   | NM002122    | MHC class II molecule                                      | 8/8                           | 2.5 ± 1.3            | 2.5 ± 1.3                | 0.0005                    | (6)  |
| IL1b       | IL1B       | NM00576     | Mediator of the inflammatory immune response               | 8/8                           | 3.6 ± 3.5            | 3.6 ± 3.5                | <0.0001                   | (7)  |
| Itk        | ITK        | NM005546    | IL2-inducible kinase expressed in T cells                  | 7/8                           | 4.6 ± 7.3            | 5.1 ± 7.1                | 0.005                     | (8)  |
| Lag3       | LAG3       | NM002286    | MHC class II binding CD4 homologue                         | 6/8                           | 3 ± 2.4              | 3.5 ± 2.6                | 0.007                     | (9)  |
| Lck        | LCK        | NM001042771 | T cell specific Src family member                          | 7/8                           | 3.7 ± 3.6            | 4 ± 3.8                  | 0.002                     | (10) |
| Nfatc2     | NFATC2     | NM01136021  | NFAT family member expressed in B and T cells              | 7/8                           | 0.4 ± 0.2            | 0.3 ± 0.1                | 0.001                     | (11) |
| Ppia       | PPIA       | NM021130    | cyclosporine A-mediated immunosuppression                  | 8/8                           | 3.5 ± 2.1            | 3.5 ± 2.1                | <0.0001                   | (12) |
| Ptpnc1     | PTPNC1     | NM002838    | Hematopoietic-specific protein tyrosine phosphatase        | 8/8                           | 1.8 ± 0.9            | 1.8 ± 0.9                | 0.004                     | (13) |
| Slamf6     | SLAMF6     | NM052931    | Expressed on NK, B and T cells                             | 7/8                           | 2.1 ± 2.3            | 2.2 ± 2.5                | 0.01                      | (14) |
| Slamf7     | SLAMF7     | NM021181    | Expressed on NK, B and T cells                             | 7/8                           | 2.5 ± 1.8            | 2.6 ± 1.9                | 0.01                      | (14) |
| Slamf9     | SLAMF9     | NM033438    | Expressed on NK, B and T cells                             | 7/8                           | 1.6 ± 0.5            | 1.7 ± 0.4                | 0.007                     | (14) |
| Tcra       | TCRA       | NC000014.8  | T cell receptor, alpha chain                               | 8/8                           | 4.7 ± 8.1            | 4.7 ± 8.1                | 0.004                     | (15) |
| Tnfrsf19l  | RELT       | NM032871    | Hematopoietic TNFR family member                           | 7/8                           | 1.6 ± 0.9            | 1.7 ± 1                  | 0.008                     | (16) |
| Tnfrsf7    | CD27       | NM001242    | TNFR family member required for T cell immunity            | 6/8                           | 2.5 ± 2.5            | 3 ± 2.7                  | 0.003                     | (17) |
| Vtcn1      | VTCN1      | NM024626    | Co-stimulatory molecule on APCs                            | 7/8                           | 2.1 ± 1.4            | 2.2 ± 1.4                | 0.01                      | (18) |
| Atrn       | ATRAN      | NM139322    | Cytokine/receptor interactions in activated T cells        | 8/8                           | 1.4 ± 0.4            | 1.4 ± 0.4                | 0.003                     | (19) |
| CD69       | CD69       | NM001781    | Induced in T cells following antigen activation            | 6/8                           | 2.4 ± 2.2            | 2.8 ± 2.5                | 0.0005                    | (20) |
| Icos       | ICOS       | NM012092    | Induced in T cells following antigen activation            | 8/8                           | 3.8 ± 4.8            | 3.8 ± 4.8                | 0.003                     | (21) |
| IL7r       | IL7R       | NM002185    | Blocks apoptosis of antigen-activated T cells              | 6/8                           | 3.6 ± 2.8            | 4.3 ± 2.8                | 0.01                      | (22) |
| B2m        | B2M        | NM004048    | Beta chain of MHC class I molecules                        | 7/8                           | 3.1 ± 1.8            | 3.3 ± 1.7                | 0.007                     | (23) |
| CD8b1      | CD8B       | NM172099    | expressed by CTLs; binds MHC class I                       | 6/8                           | 3.1 ± 4.4            | 3.8 ± 4.9                | 0.01                      | (3)  |
| Gzmb       | GZMB       | NM004131    | Serine protease expressed by CTL and NK cells              | 7/8                           | 0.6 ± 0.2            | 0.6 ± 0.2                | 0.004                     | (24) |
| Ifng       | IFNG       | NM000619    | Th1 cytokine                                               | 8/8                           | 2 ± 1                | 2 ± 1                    | 0.007                     | (25) |
| Il12b      | IL12B      | NM002187    | Cytokine that sustains a Th1 response                      | 6/8                           | 1.9 ± 0.7            | 2.1 ± 0.7                | 0.002                     | (26) |
| Lilrb3     | LILRB3     | NM001081450 | Binds MHC class I; inhibits immune response                | 6/8                           | 1.9 ± 1.4            | 2.2 ± 1.5                | 0.002                     | (27) |
| Tia1       | TIA1       | NM022037    | Nucleolytic activity against CTL target cells              | 8/8                           | 0.8 ± 1.5            | 0.8 ± 1.5                | 0.0007                    | (28) |
| CD72       | CD72       | NM001782    | Regulates B cell signaling                                 | 7/8                           | 2 ± 0.6              | 2.1 ± 0.5                | 0.01                      | (29) |
| Igh-4      | IGHG1      | NC000014.8  | Ig heavy chain constant gamma 1 region                     | 8/8                           | 7.4 ± 4.9            | 7.4 ± 4.9                | 0.005                     | (30) |
| Igh-6      | IGHM       | NC000014.8  | Ig heavy chain constant mu region                          | 8/8                           | 2.8 ± 2.9            | 2.8 ± 2.9                | 0.001                     | (30) |
| Igh-1a     | IGHG2      | NC000014.8  | Ig heavy chain constant gamma 2 region                     | qRT-PCR <sup>f</sup>          | 1.9 ± 0.8            | 2.5 ± 0.7                | 0.008                     | (30) |
| IgJ        | IGJ        | NC000004.11 | Linker protein Ig alpha and mu polypeptides                | 8/8                           | 13.8 ± 11.7          | 13.8 ± 11.7              | <0.0001                   | (31) |
| IL4        | IL4        | NM00589     | Important for Th2 cell differentiation                     | 7/8                           | 1.7 ± 0.5            | 1.6 ± 0.5                | 0.002                     | (32) |
| C1s        | C1S        | NM001734    | Serine protease; initiates complement cascade              | 7/8                           | 2 ± 1                | 2.3 ± 1.3                | 0.01                      | (33) |
| C3         | C3         | NM000064    | Activation of the complement system                        | 7/8                           | 3 ± 2.2              | 3.3 ± 2.1                | 0.0008                    | (33) |

<sup>a</sup>The 43 gene SRIS is composed of genes that are differentially expressed in NIC/ShcA<sup>fl/fl</sup> tumors and are associated with pan T cells (yellow), activated T cells (blue), the Th1/CTL response (green) and the Th2/humoral immune response (red).

<sup>b</sup>Number of NIC/ShcA<sup>fl/fl</sup> tumors in which each gene is differentially expressed by Agilent arrays.

<sup>c</sup>Average fold change (log<sub>2</sub> values) on Agilent arrays over all 8 individual NIC/ShcA<sup>fl/fl</sup> tumors relative to a pool of 5 NIC/ShcA<sup>+/+</sup> tumors.

<sup>d</sup>Average fold change (log<sub>2</sub> values) on Agilent arrays NIC/ShcA<sup>fl/fl</sup> tumors that are differentially expressed (p≤0.01) relative to a pool of 5 NIC/ShcA<sup>+/+</sup> tumors.

<sup>e</sup>Average p value in NIC/ShcA<sup>fl/fl</sup> tumors in which the gene is differentially expressed.

<sup>f</sup>Three genes were not differentially expressed in 6/8 of of NIC/ShcA<sup>fl/fl</sup> tumors based on Agilent arrays but validated as being differentially expressed by qRT-PCR or IHC analyses and thus are included within the SRIS.

## References

1. Weissman AM, Hou D, Orloff DG, Modi WS, Seuanez H, O'Brien SJ, et al. Molecular cloning and chromosomal localization of the human T-cell receptor zeta chain: distinction from the molecular CD3 complex. *Proc Natl Acad Sci U S A.* 1988;85:9709-13.
2. Frank SJ, Samelson LE, Klausner RD. The structure and signalling functions of the invariant T cell receptor components. *Semin Immunol.* 1990;2:89-97.
3. Miceli MC, Parnes JR. Role of CD4 and CD8 in T cell activation and differentiation. *Adv Immunol.* 1993;53:59-122.
4. Rudd CE, Taylor A, Schneider H. CD28 and CTLA-4 coreceptor expression and signal transduction. *Immunol Rev.* 2009;229:12-26.
5. Vandercappellen J, Van Damme J, Struyf S. The role of CXC chemokines and their receptors in cancer. *Cancer Lett.* 2008;267:226-44.
6. Mach B, Steimle V, Martinez-Soria E, Reith W. Regulation of MHC class II genes: lessons from a disease. *Annu Rev Immunol.* 1996;14:301-31.
7. Roy D, Sarkar S, Felty Q. Levels of IL-1 beta control stimulatory/inhibitory growth of cancer cells. *Front Biosci.* 2006;11:889-98.
8. Readinger JA, Mueller KL, Venegas AM, Horai R, Schwartzberg PL. Tec kinases regulate T-lymphocyte development and function: new insights into the roles of Itk and Rlk/Txk. *Immunol Rev.* 2009;228:93-114.
9. Triebel F. LAG-3: a regulator of T-cell and DC responses and its use in therapeutic vaccination. *Trends Immunol.* 2003;24:619-22.
10. Salmond RJ, Filby A, Qureshi I, Caserta S, Zamoyska R. T-cell receptor proximal signaling via the Src-family kinases, Lck and Fyn, influences T-cell activation, differentiation, and tolerance. *Immunol Rev.* 2009;228:9-22.
11. Peng SL, Gerth AJ, Ranger AM, Glimcher LH. NFATc1 and NFATc2 together control both T and B cell activation and differentiation. *Immunity.* 2001;14:13-20.
12. Colgan J, Asmal M, Yu B, Luban J. Cyclophilin A-deficient mice are resistant to immunosuppression by cyclosporine. *J Immunol.* 2005;174:6030-8.
13. Hermiston ML, Zikherman J, Zhu JW. CD45, CD148, and Lyp/Pep: critical phosphatases regulating Src family kinase signaling networks in immune cells. *Immunol Rev.* 2009;228:288-311.
14. Ma CS, Nichols KE, Tangye SG. Regulation of cellular and humoral immune responses by the SLAM and SAP families of molecules. *Annu Rev Immunol.* 2007;25:337-79.
15. Minden MD, Mak TW. The structure of the T cell antigen receptor genes in normal and malignant T cells. *Blood.* 1986;68:327-36.
16. Sica GL, Zhu G, Tamada K, Liu D, Ni J, Chen L. RELT, a new member of the tumor necrosis factor receptor superfamily, is selectively expressed in hematopoietic tissues and activates transcription factor NF-kappaB. *Blood.* 2001;97:2702-7.
17. Croft M. The role of TNF superfamily members in T-cell function and diseases. *Nat Rev Immunol.* 2009;9:271-85.
18. Yi KH, Chen L. Fine tuning the immune response through B7-H3 and B7-H4. *Immunol Rev.* 2009;229:145-51.
19. Duke-Cohan JS, Tang W, Schlossman SF. Attractin: a cub-family protease involved in T cell-monocyte/macrophage interactions. *Adv Exp Med Biol.* 2000;477:173-85.
20. Ziegler SF, Ramsdell F, Hjerrild KA, Armitage RJ, Grabstein KH, Hennen KB, et al. Molecular characterization of the early activation antigen CD69: a type II membrane glycoprotein related to a family of natural killer cell activation antigens. *Eur J Immunol.* 1993;23:1643-8.
21. van Berkel ME, Oosterwegel MA. CD28 and ICOS: similar or separate costimulators of T cells? *Immunol Lett.* 2006;105:115-22.

22. Colpitts SL, Dalton NM, Scott P. IL-7 receptor expression provides the potential for long-term survival of both CD62L<sup>high</sup> central memory T cells and Th1 effector cells during *Leishmania major* infection. *J Immunol*. 2009;182:5702-11.
23. Cresswell P, Ackerman AL, Giodini A, Peaper DR, Wearsch PA. Mechanisms of MHC class I-restricted antigen processing and cross-presentation. *Immunol Rev*. 2005;207:145-57.
24. Chowdhury D, Lieberman J. Death by a thousand cuts: granzyme pathways of programmed cell death. *Annu Rev Immunol*. 2008;26:389-420.
25. Schroder K, Hertzog PJ, Ravasi T, Hume DA. Interferon-gamma: an overview of signals, mechanisms and functions. *J Leukoc Biol*. 2004;75:163-89.
26. Del Vecchio M, Bajetta E, Canova S, Lotze MT, Wesa A, Parmiani G, et al. Interleukin-12: biological properties and clinical application. *Clin Cancer Res*. 2007;13:4677-85.
27. Anderson KJ, Allen RL. Regulation of T-cell immunity by leucocyte immunoglobulin-like receptors: innate immune receptors for self on antigen-presenting cells. *Immunology*. 2009;127:8-17.
28. Anderson P. TIA-1: structural and functional studies on a new class of cytolytic effector molecule. *Curr Top Microbiol Immunol*. 1995;198:131-43.
29. Wu HJ, Bondada S. Positive and negative roles of CD72 in B cell function. *Immunol Res*. 2002;25:155-66.
30. Berman JE, Mellis SJ, Pollock R, Smith CL, Suh H, Heinke B, et al. Content and organization of the human Ig VH locus: definition of three new VH families and linkage to the Ig CH locus. *EMBO J*. 1988;7:727-38.
31. Niles MJ, Matsuuchi L, Koshland ME. Polymer IgM assembly and secretion in lymphoid and nonlymphoid cell lines: evidence that J chain is required for pentamer IgM synthesis. *Proc Natl Acad Sci U S A*. 1995;92:2884-8.
32. Li-Weber M, Krammer PH. Regulation of IL4 gene expression by T cells and therapeutic perspectives. *Nat Rev Immunol*. 2003;3:534-43.
33. Duncan RC, Wijeyewickrema LC, Pike RN. The initiating proteases of the complement system: controlling the cleavage. *Biochimie*. 2008;90:387-95.

**Supplementary Table 4:** The SRIS functions as an independent prognostic marker within the HER2 and basal subtypes among 12 publically available datasets.

|           | Variable        | Hazard Ratio | Standard Error | P-Value           |
|-----------|-----------------|--------------|----------------|-------------------|
| Luminal A | Grade II        | 1.732        | 0.287          | 0.056             |
|           | Grade III       | 2.617        | 0.392          | 0.014*            |
|           | LN +ve          | 1.717        | 0.246          | 0.028*            |
|           | Her2+           | 2.505        | 0.530          | 0.083             |
|           | ER+             | 0.853        | 0.531          | 0.76              |
|           | <b>SRIS-Low</b> | <b>0.751</b> | <b>0.386</b>   | <b>0.46</b>       |
| Luminal B | Grade II        | 1.999        | 0.328          | 0.034*            |
|           | Grade III       | 2.556        | 0.339          | 0.0056**          |
|           | LN +ve          | 1.893        | 0.187          | 0.0007**          |
|           | Her2+           | 0.979        | 0.601          | 0.97              |
|           | ER+             | 0.524        | 0.394          | 0.1               |
|           | <b>SRIS-Low</b> | <b>1.394</b> | <b>0.284</b>   | <b>0.24</b>       |
| Normal    | Grade II        | 2.075        | 0.463          | 0.12              |
|           | Grade III       | 1.917        | 0.621          | 0.29              |
|           | LN +ve          | 2.252        | 0.361          | 0.025*            |
|           | Her2+           | 0.541        | 0.643          | 0.34              |
|           | ER+             | 0.430        | 0.417          | 0.043*            |
|           | <b>SRIS-Low</b> | <b>2.246</b> | <b>0.647</b>   | <b>0.21</b>       |
| Her2      | Grade II        | 1.627        | 1.007          | 0.31              |
|           | Grade III       | 1.609        | 0.979          | 0.33              |
|           | LN +ve          | 1.240        | 1.017          | 0.31              |
|           | Her2+           | 1.043        | 0.180          | 0.86              |
|           | ER+             | 0.768        | -1.184         | 0.24              |
|           | <b>SRIS-Low</b> | <b>2.088</b> | <b>3.068</b>   | <b>0.002**</b>    |
| Basal     | Grade II        | 1.044        | 0.614          | 0.94              |
|           | Grade III       | 1.000        | 0.599          | 1.0               |
|           | LN +ve          | 1.373        | 0.205          | 0.12              |
|           | Her2+           | 0.515        | 0.460          | 0.15              |
|           | ER+             | 0.840        | 0.209          | 0.4               |
|           | <b>SRIS-Low</b> | <b>2.551</b> | <b>0.210</b>   | <b>0.000009**</b> |

\*p<0.05

\*\*p<0.01

Supplementary Table 5: Published datasets used to interrogate the relationship between expression of the SRIS and patient outcome.

| Dataset       | Luminal A <sup>a</sup> | Luminal B <sup>a</sup> | Normal <sup>a</sup> | HER2 <sup>a</sup> | Basal <sup>a</sup> | Total <sup>a</sup> | Reference <sup>c</sup> |
|---------------|------------------------|------------------------|---------------------|-------------------|--------------------|--------------------|------------------------|
| Anders        | 16                     | 21                     | 10                  | 9                 | 22                 | 78                 | (1)                    |
| Bild          | 26                     | 35                     | 21                  | 37                | 39                 | 158                | (2)                    |
| Chin          | 28                     | 31                     | 10                  | 20                | 29                 | 118                | (3)                    |
| Desmedt       | 59                     | 46                     | 18                  | 28                | 47                 | 198                | (4)                    |
| Ivshina       | 66                     | 61                     | 35                  | 38                | 49                 | 249                | (5)                    |
| Loi           | 98                     | 111                    | 66                  | 48                | 91                 | 414                | (6)                    |
| Van de Vijver | 97                     | 66                     | 18                  | 56                | 58                 | 295                | (7)                    |
| Parker        | 53                     | 54                     | 18                  | 34                | 66                 | 225                | (8)                    |
| Pawitan       | 35                     | 34                     | 32                  | 29                | 29                 | 159                | (9)                    |
| Schmidt       | 63                     | 34                     | 35                  | 30                | 38                 | 200                | (10)                   |
| Sotiriou      | 16                     | 32                     | 19                  | 13                | 21                 | 101                | (11)                   |
| Wang          | 72                     | 72                     | 29                  | 48                | 65                 | 286                | (12)                   |
|               | <b>629</b>             | <b>597</b>             | <b>311</b>          | <b>390</b>        | <b>554</b>         | <b>2481</b>        |                        |

<sup>a</sup>Total number of patients classified within each group

#### References

- Anders CK, Acharya CR, Hsu DS, Broadwater G, Garman K, Foekens JA, et al. Age-specific differences in oncogenic pathway deregulation seen in human breast tumors. *PLoS One*. 2008;3:e1373.
- Bild AH, Yao G, Chang JT, Wang Q, Potti A, Chasse D, et al. Oncogenic pathway signatures in human cancers as a guide to targeted therapies. *Nature*. 2006;439:353-7.
- Chin K, DeVries S, Fridlyand J, Spellman PT, Roydasgupta R, Kuo WL, et al. Genomic and transcriptional aberrations linked to breast cancer pathophysiologies. *Cancer Cell*. 2006;10:529-41.
- Desmedt C, Piette F, Loi S, Wang Y, Lallemand F, Haibe-Kains B, et al. Strong time dependence of the 76-gene prognostic signature for node-negative breast cancer patients in the TRANSBIG multicenter independent validation series. *Clin Cancer Res*. 2007;13:3207-14.
- Ivshina AV, George J, Senko O, Mow B, Putti TC, Smeds J, et al. Genetic reclassification of histologic grade delineates new clinical subtypes of breast cancer. *Cancer Res*. 2006;66:10292-301.
- Loi S, Haibe-Kains B, Desmedt C, Wirapati P, Lallemand F, Tutt AM, et al. Predicting prognosis using molecular profiling in estrogen receptor-positive breast cancer treated with tamoxifen. *BMC Genomics*. 2008;9:239.
- van de Vijver MJ, He YD, van't Veer LJ, Dai H, Hart AA, Voskuil DW, et al. A gene-expression signature as a predictor of survival in breast cancer. *N Engl J Med*. 2002;347:1999-2009.
- Parker JS, Mullins M, Cheang MC, Leung S, Voduc D, Vickery T, et al. Supervised risk predictor of breast cancer based on intrinsic subtypes. *J Clin Oncol*. 2009;27:1160-7.
- Pawitan Y, Bjohle J, Amler L, Borg AL, Egyhazi S, Hall P, et al. Gene expression profiling spares early breast cancer patients from adjuvant therapy: derived and validated in two population-based cohorts. *Breast Cancer Res*. 2005;7:R953-64.
- Schmidt M, Bohm D, von Torne C, Steiner E, Puhl A, Pilch H, et al. The humoral immune system has a key prognostic impact in node-negative breast cancer. *Cancer Res*. 2008;68:5405-13.
- Sotiriou C, Wirapati P, Loi S, Harris A, Fox S, Smeds J, et al. Gene expression profiling in breast cancer: understanding the molecular basis of histologic grade to improve prognosis. *J Natl Cancer Inst*. 2006;98:262-72.
- Wang Y, Klijn JG, Zhang Y, Sieuwerts AM, Look MP, Yang F, et al. Gene-expression profiles to predict distant metastasis of lymph-node-negative primary breast cancer. *Lancet*. 2005;365:671-9.

**Supplementary Table 6: Primer sequences and conditions used for quantitative real-time polymerase chain reactions.**

| <b>Gene</b> | <b>Forward Primer Sequence</b> | <b>Reverse Primer Sequence</b> | <b>Input RNA (ng)</b> | <b>Detection Temp (°C)</b> |
|-------------|--------------------------------|--------------------------------|-----------------------|----------------------------|
| CD28        | GTTTTCACTTGCCAGCACAT           | ACCCCAAACACCAACTTAGC           | 25                    | 72                         |
| CXCR3       | ATGCCTTTGTGGGAGTGAAG           | AGGAGGCCTCAGTTGTCTCA           | 25                    | 80                         |
| GAPDH       | CATCAAGAAGGTGGTGAAGC           | GGGAGTTGCTGTTGAAGTCG           | 25                    | 77                         |
| ICOS        | ACAGGGCACCTGACTTGATT           | GGGTCTTCCTTAAGAAGGGG           | 25                    | 72                         |
| IgHM        | GGATTGGACGGGTTTATCCT           | TAGACCGCAGAGTCCTCGAT           | 40                    | 78                         |
| IgHG1       | CGACACCCCATCTGTCTAT            | GACAGGGATCCAGAGTTCCA           | 40                    | 77                         |
| IgHG2a      | CACCTAACCTCTTGGGTGGA           | CCACGTTGTTCACAAACCAG           | 40                    | 79                         |
| IgJ         | CCCTTTGAACAACAGGGAGA           | AGGTCTCAGGAACACCATCG           | 25                    | 77                         |
| ShcA        | TTGTCAATAAGCCACACGA            | TCCGGGTATTGAAGTCAAGG           | 25                    | 78                         |
| ShcB        | AGATCCTGAAGCCACGAGAA           | GAGGCTTGACCCTGACTCTG           | 50                    | 80                         |
| ShcC        | AGCAACCAGTGGAGAGGAAA           | CCCATTTCCATAGGCTGAGA           | 25                    | 80                         |
| ShcD        | CATTGAAGCCTGGCATTITT           | GATGGAGGAAAAGCAATGGA           | 12.5                  | 72                         |
