# Supplementary material
Source: PubMed Central journal article supplement (PMC3660232)

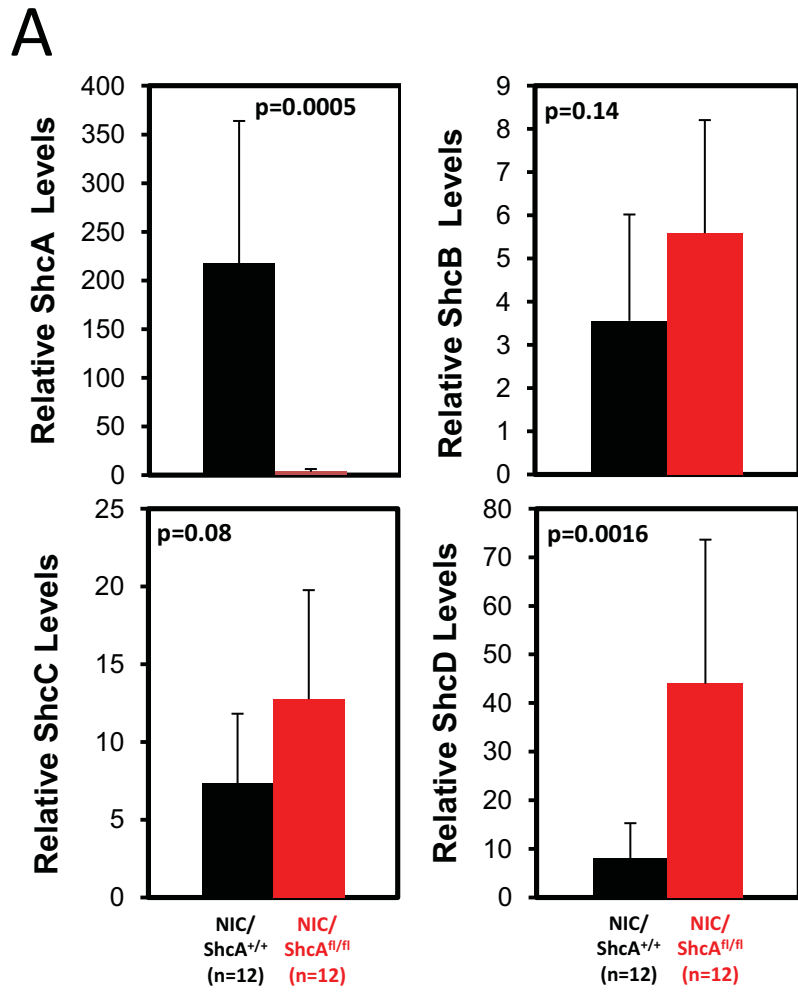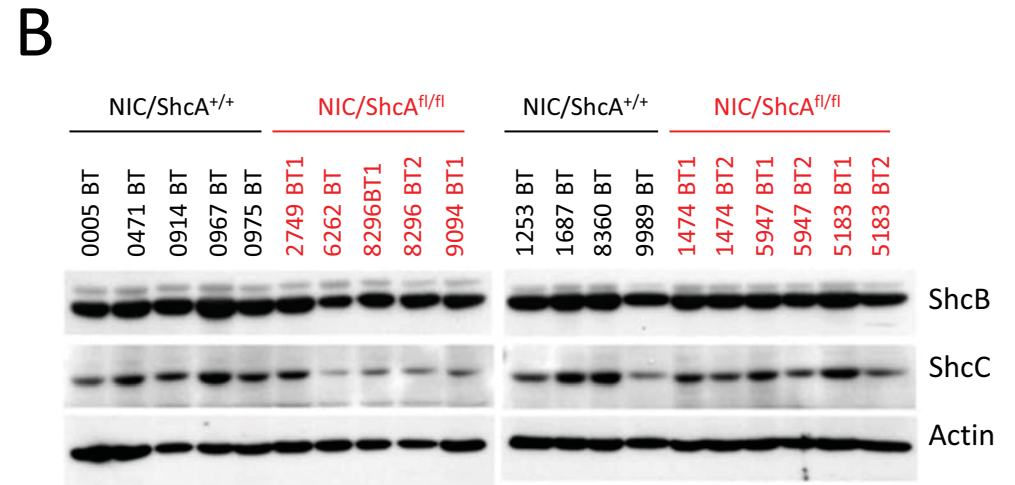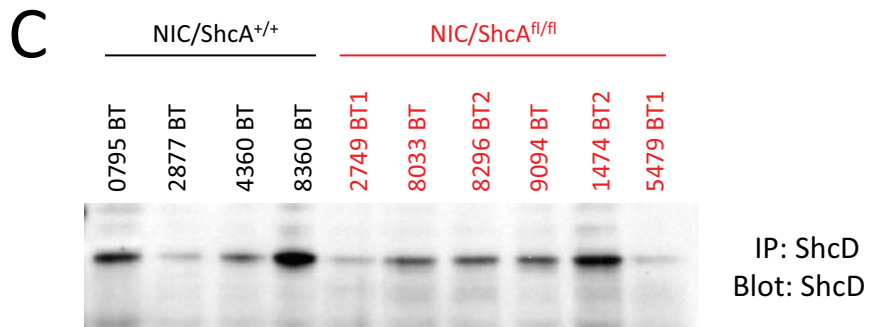

**A**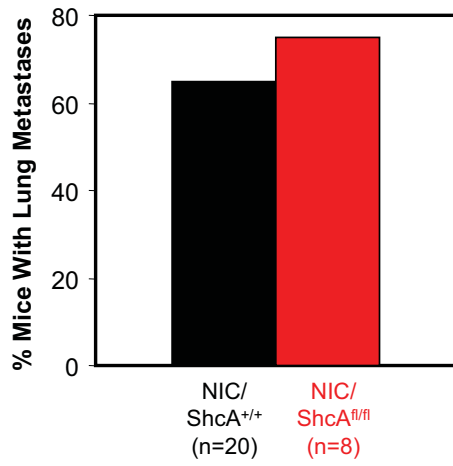**B**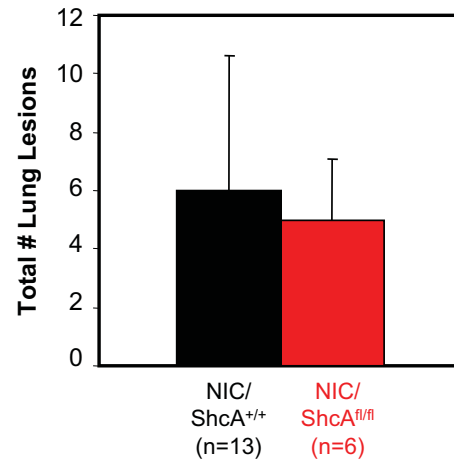**C**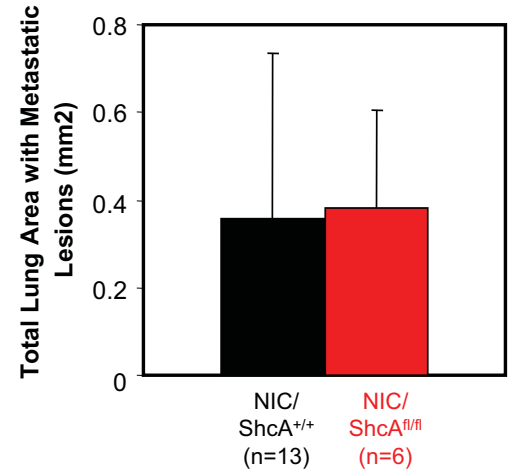

**A**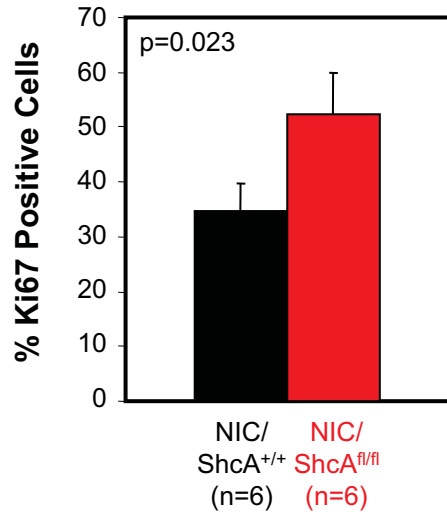**B**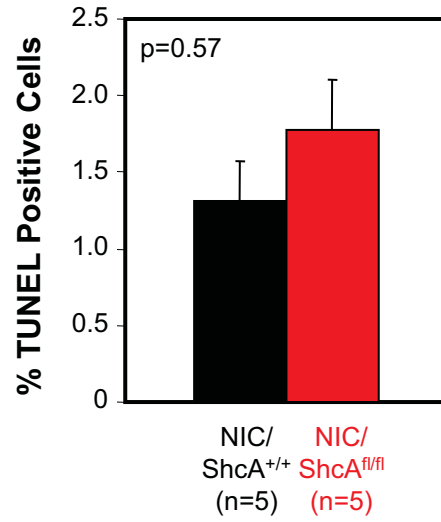**C**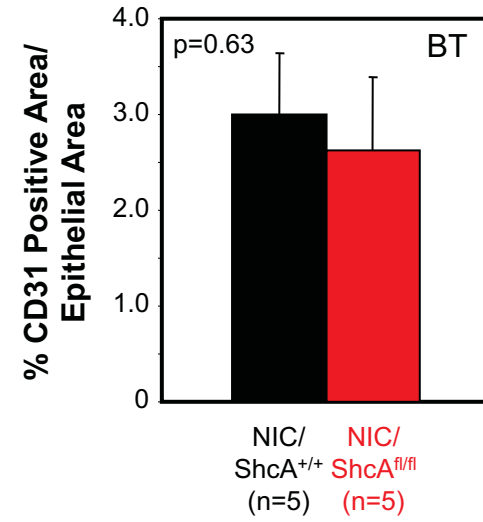**D**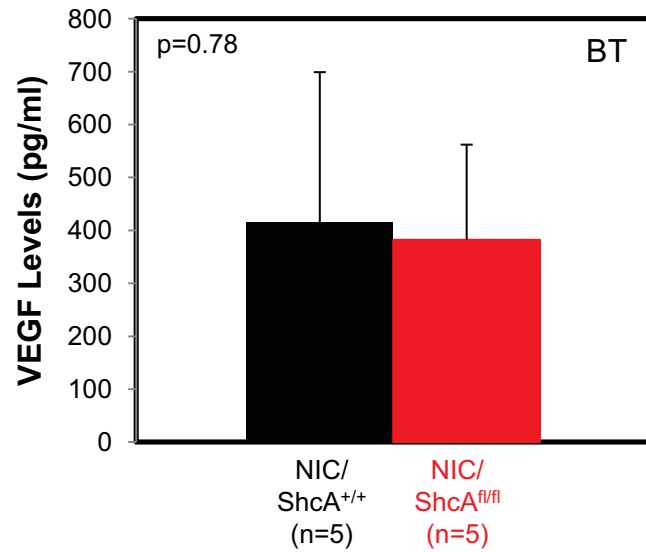**E**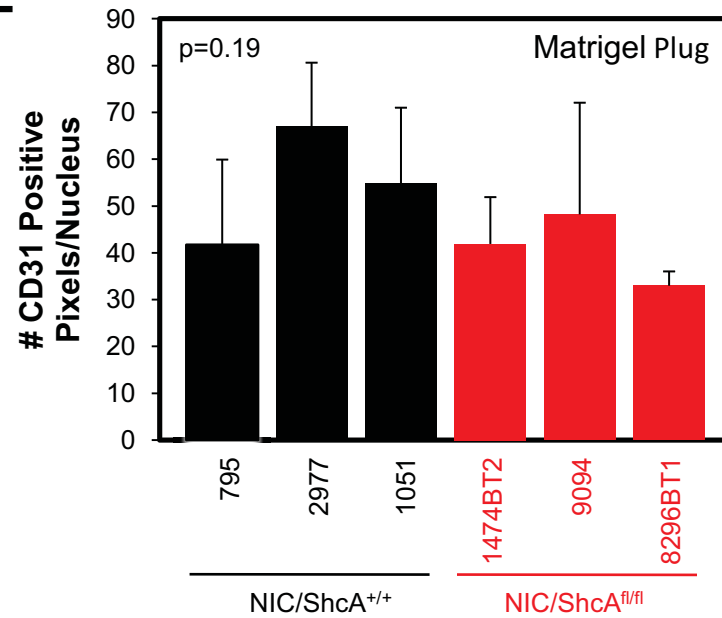

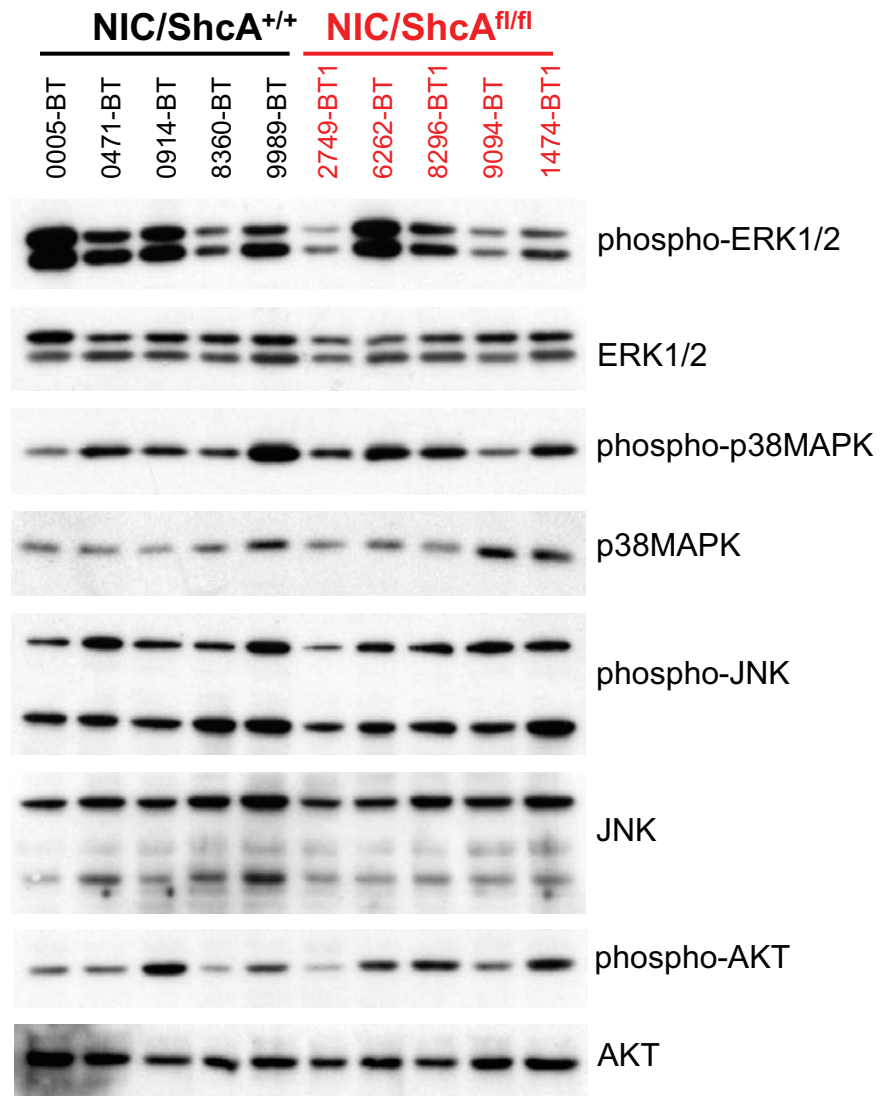

**A**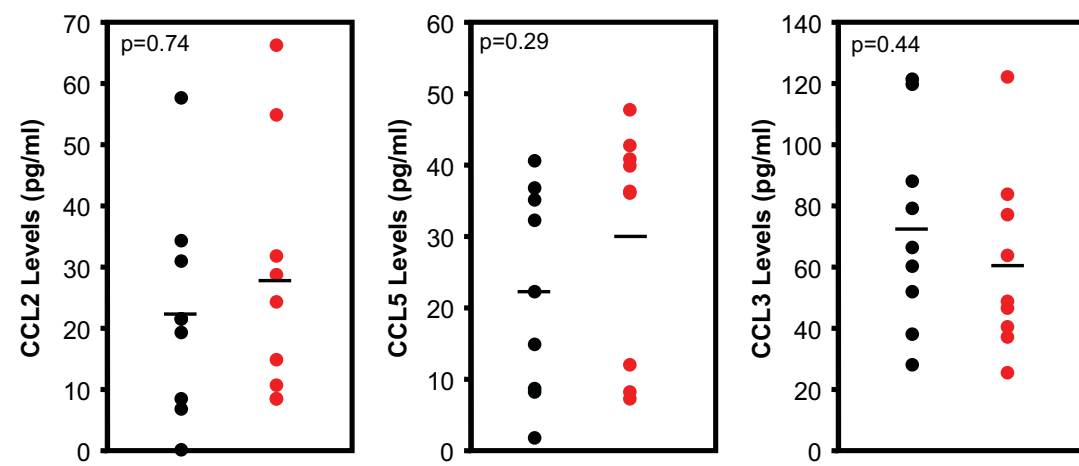**B**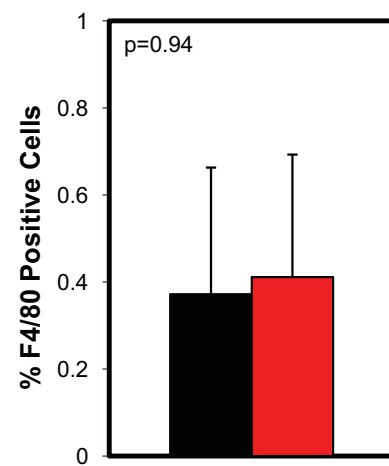

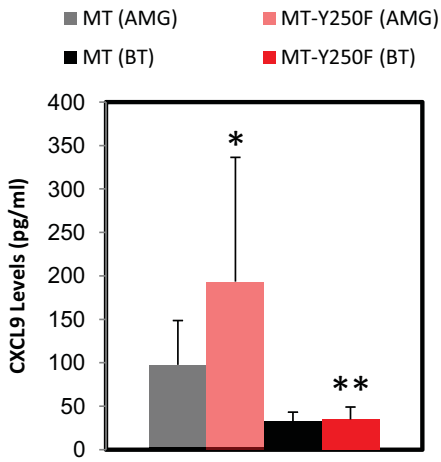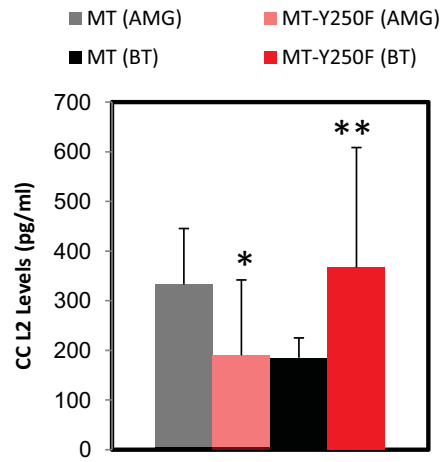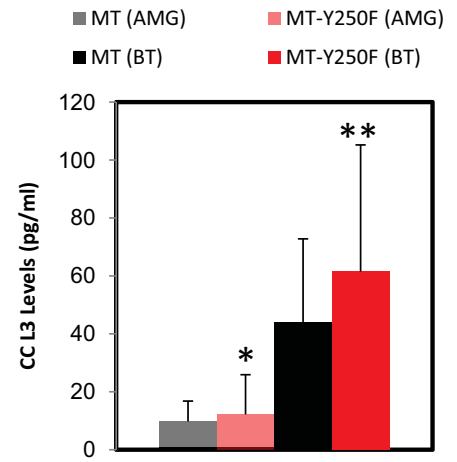

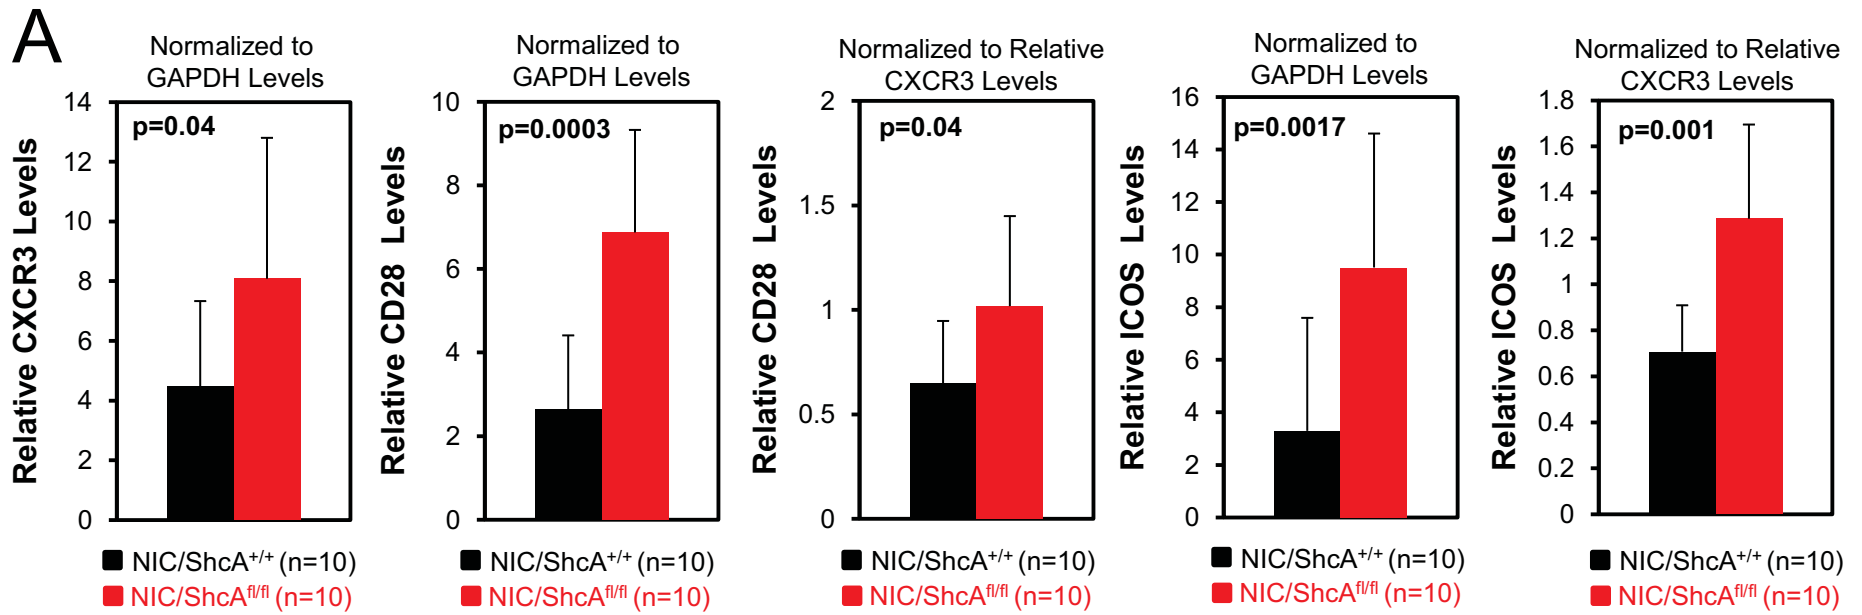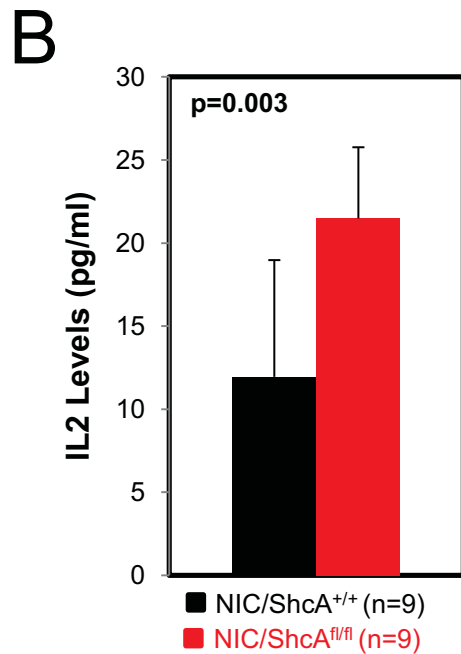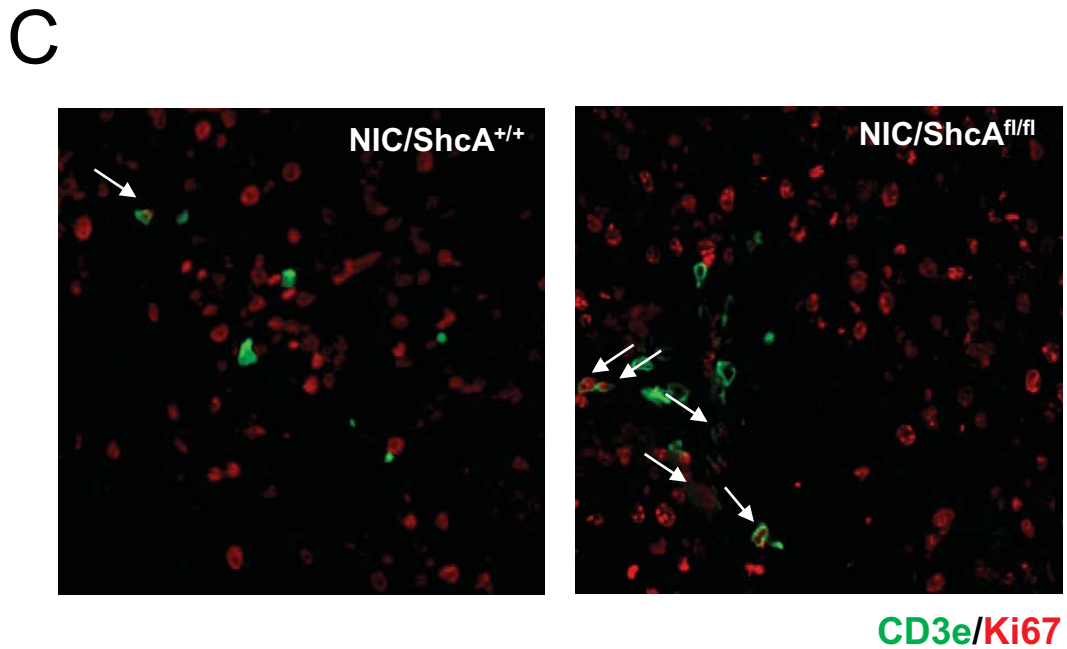

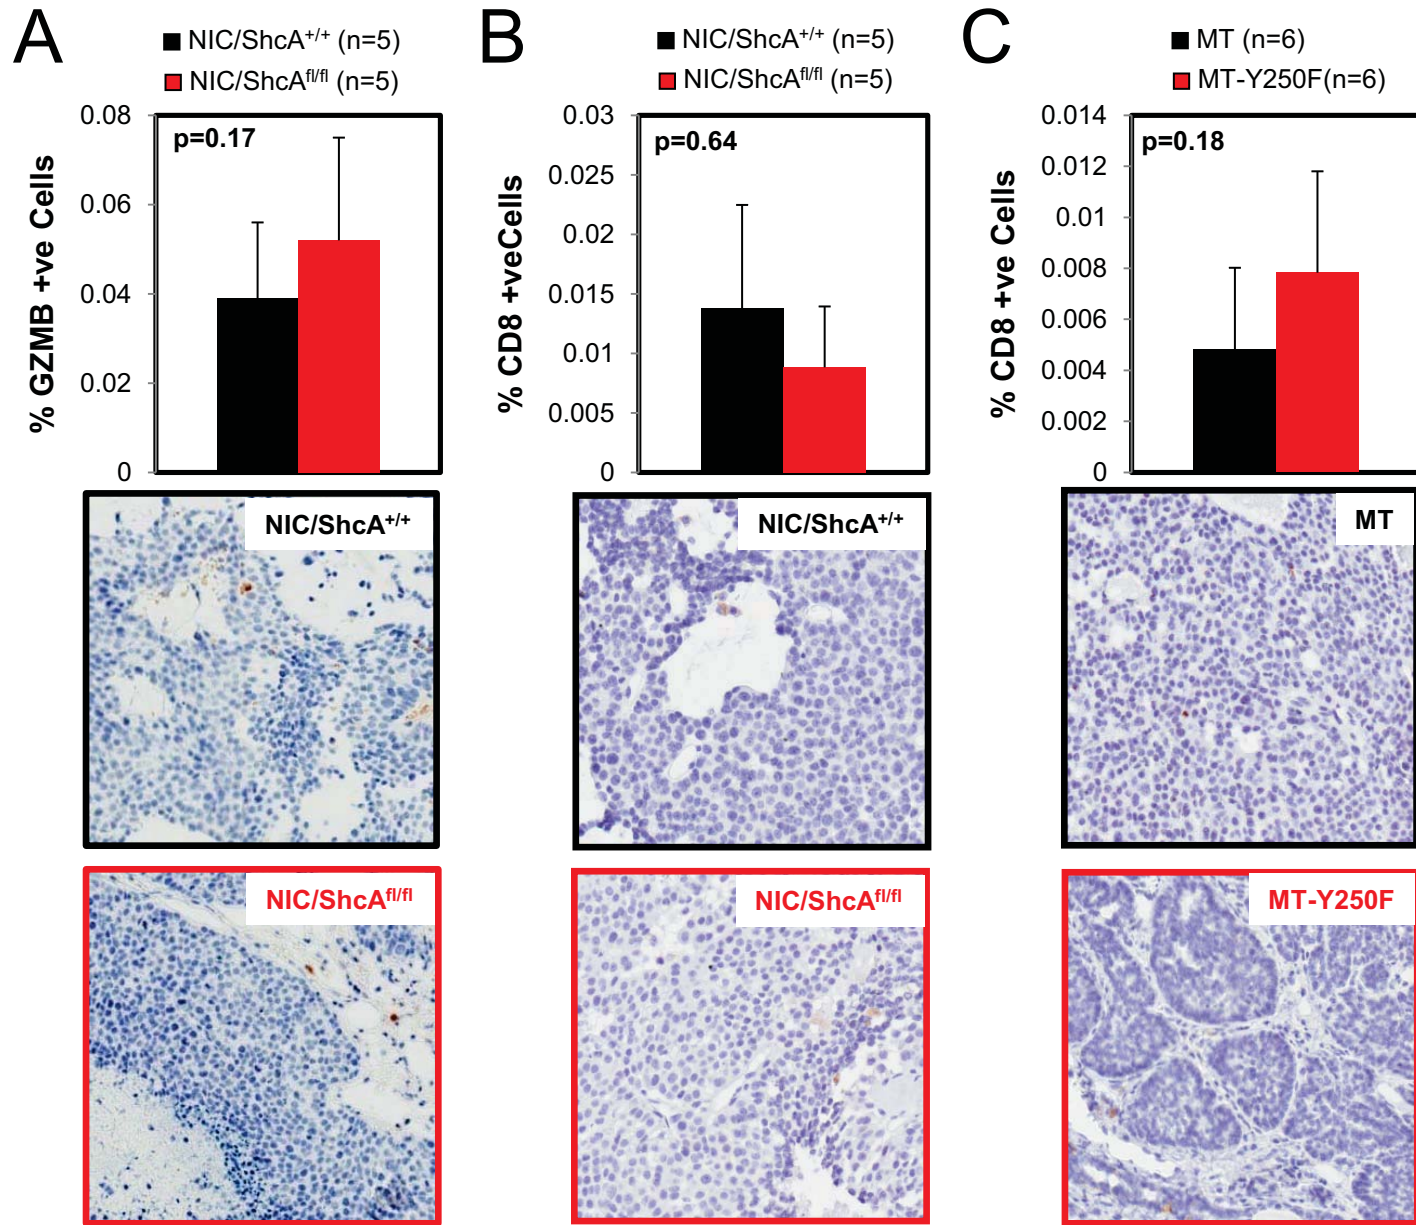



**A**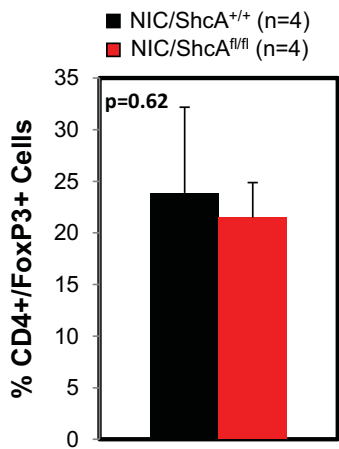**B**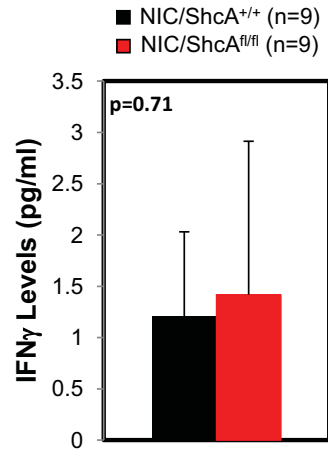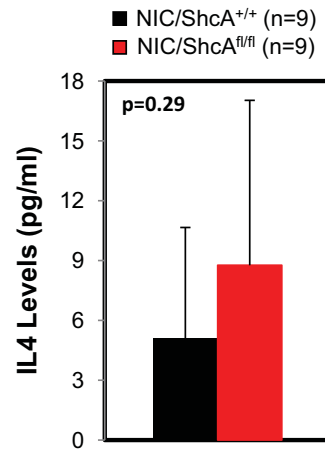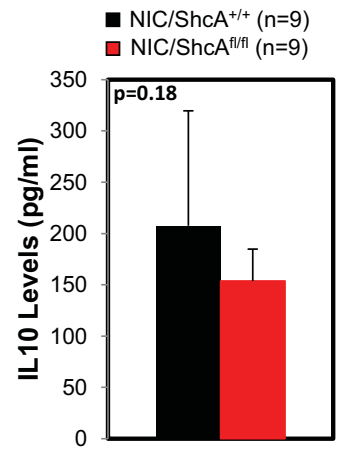

Supplement: NIHMS458377-supplement-figs_1-9.pdf [file NIHMS458377-supplement-figs_1-9.pdf]

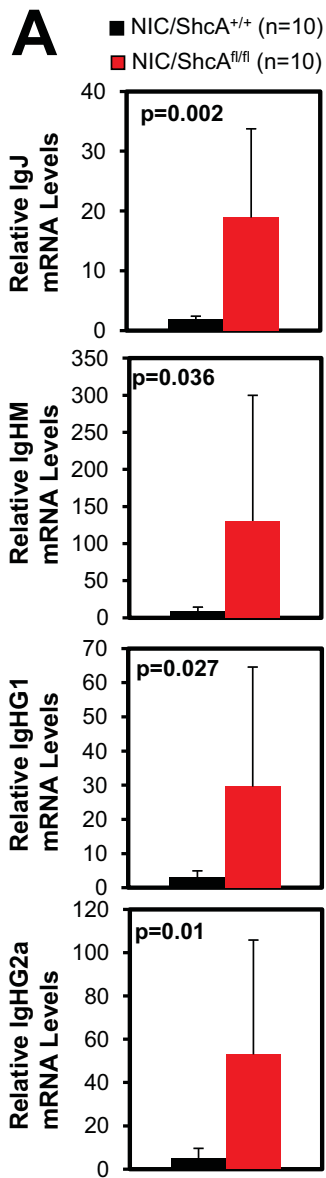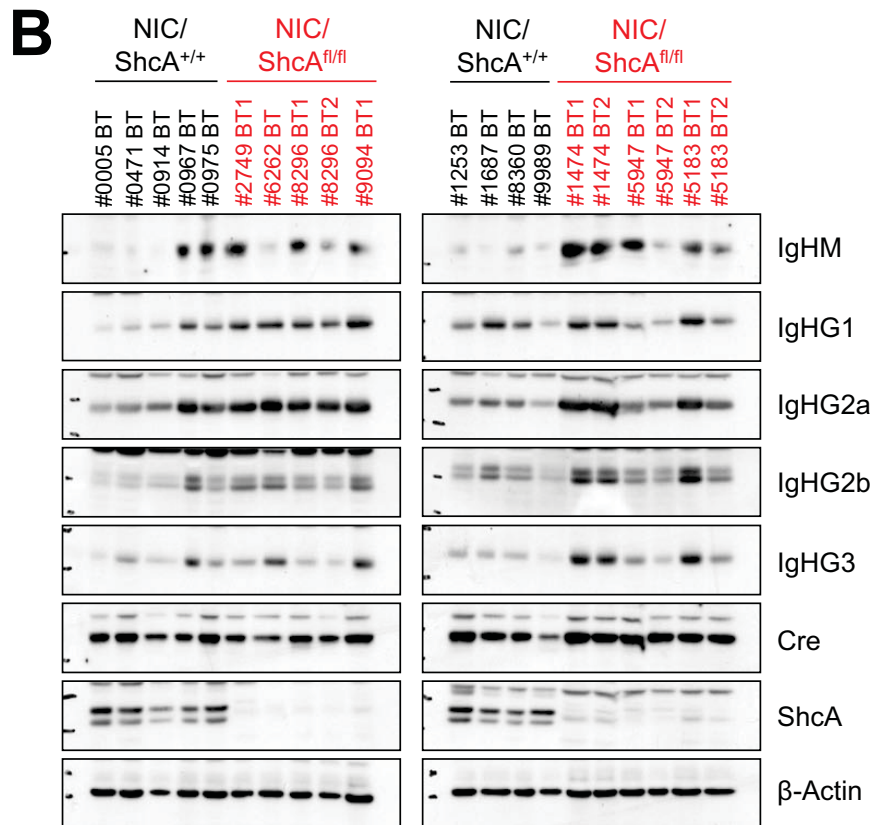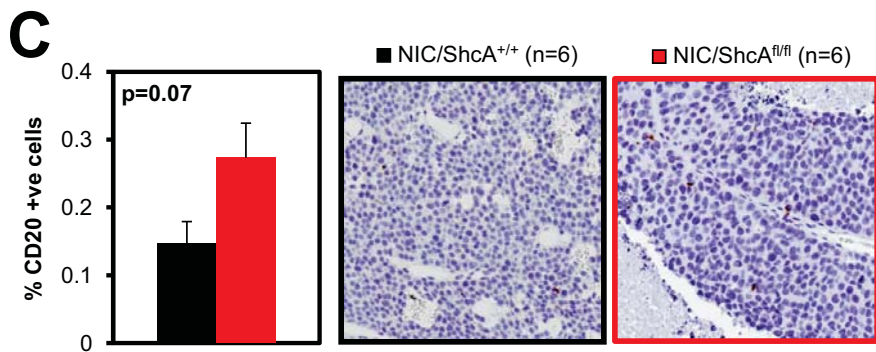

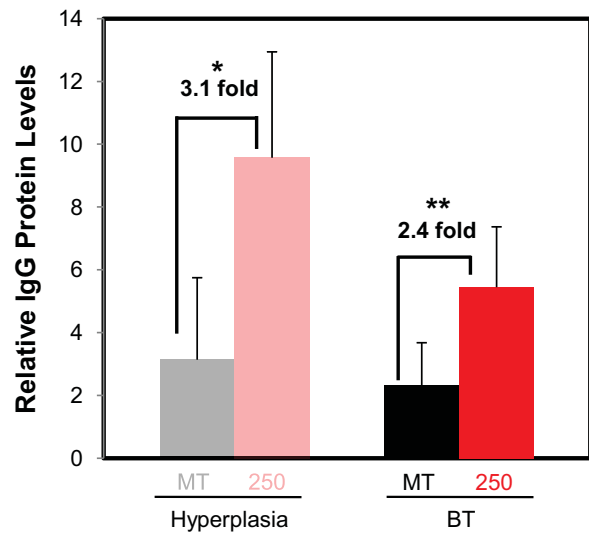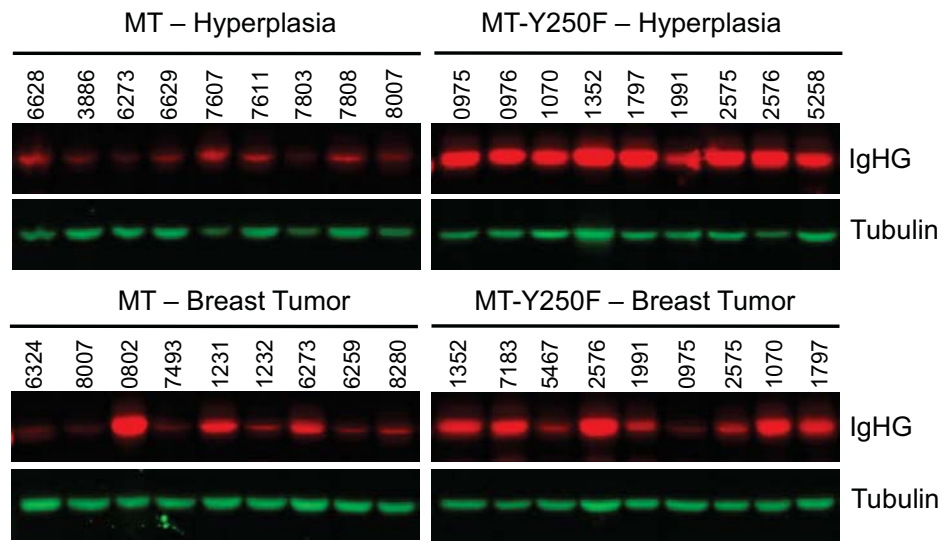

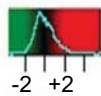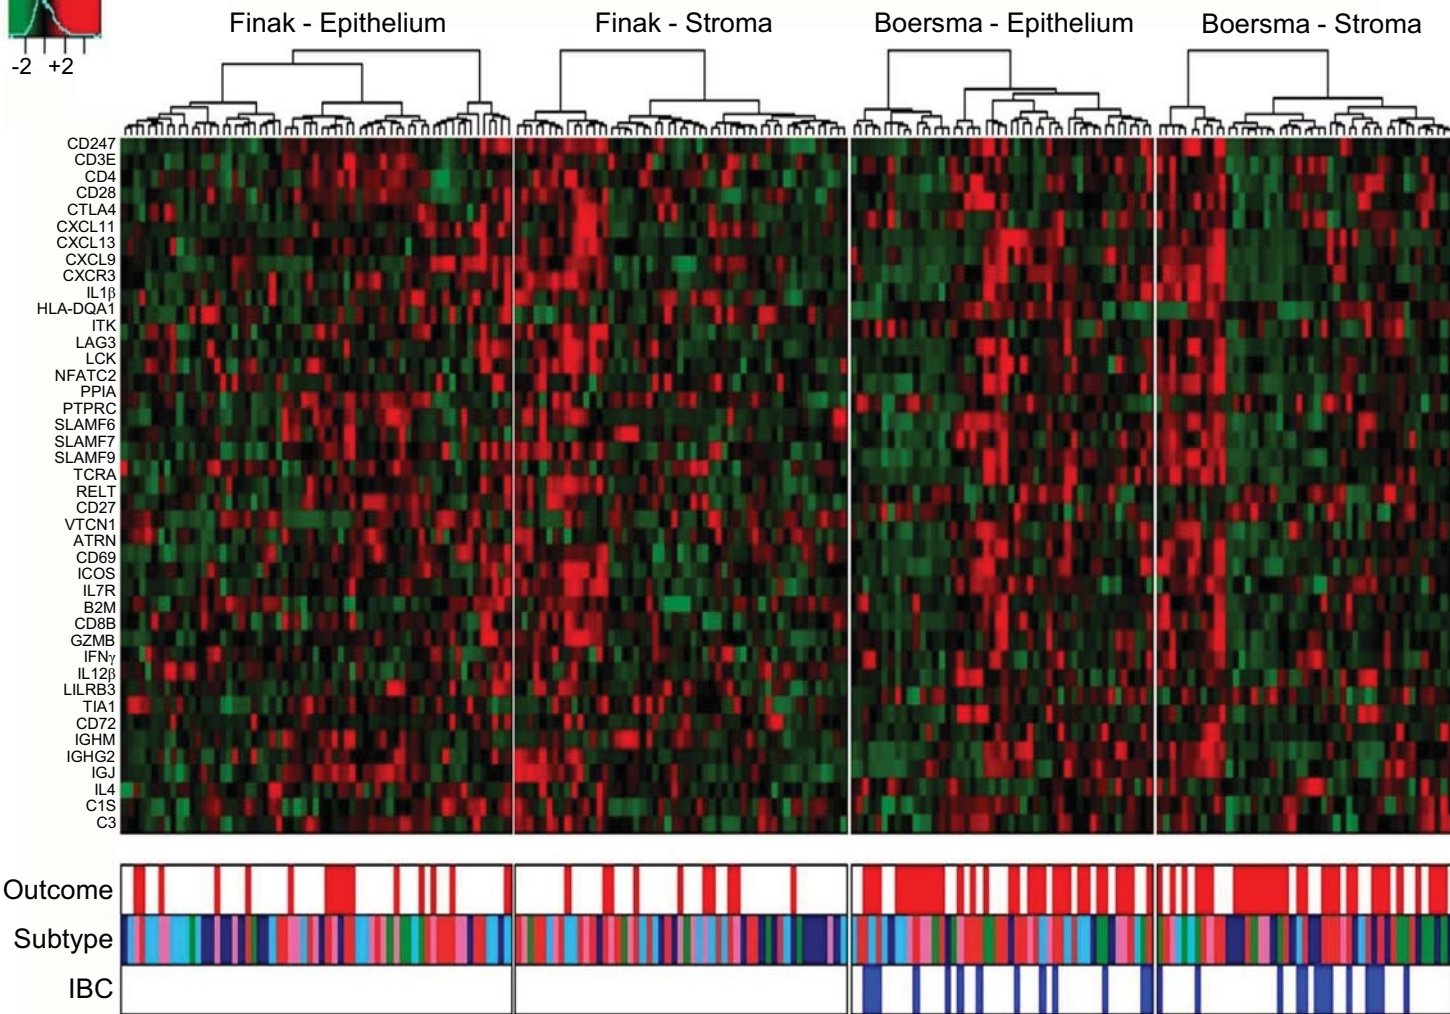

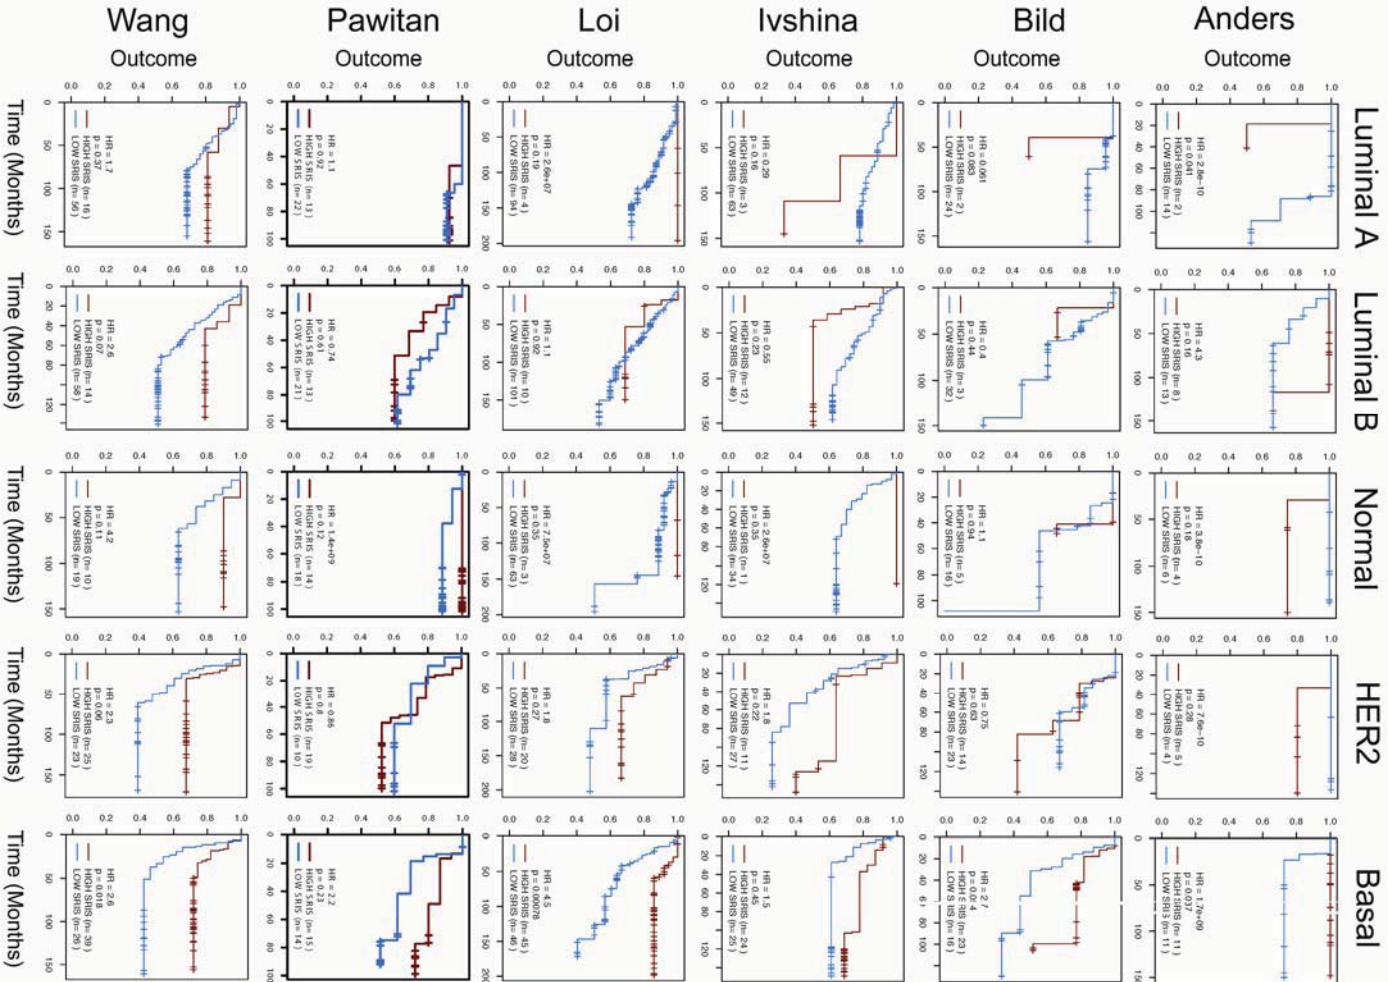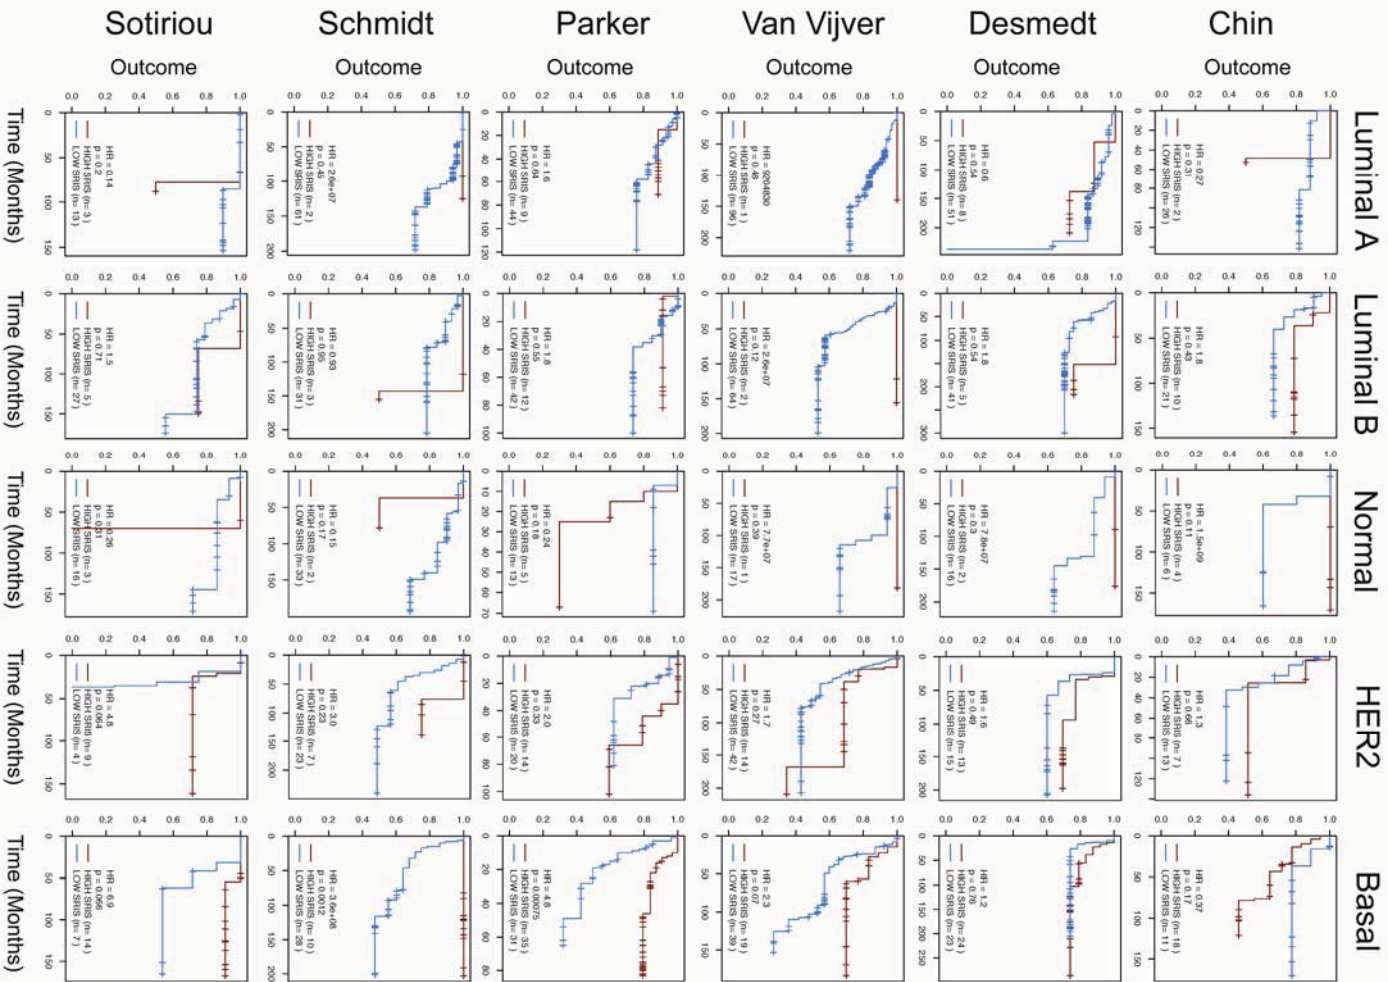

Supplement: NIHMS458377-supplement-figs_10-13.pdf [file NIHMS458377-supplement-figs_10-13.pdf]
